# Supplementary material for: A Retrospective Clinico-Pathological Analysis with Review of Literature of Oral and Cervical Lympho-Epithelial Cysts from a Pathological Perspective
Source: MDPI journal article supplement (doi:10.3390/app12052525), 2022-02-28
Supplement: s1 [file applsci-1546953-supplementary.pdf › applsci-1546953-supplementary.pdf]

## Supplementary Materials

# A Retrospective Clinico-Pathological Analysis with Review of Literature of Oral and Cervical Lympho-Epithelial Cysts from a Pathological Perspective

Lucille Trottet, Primali Rukmal Jayasooriya, Udari W. A. M. Lakshika Abeyasinghe, Ranjit B. R. Nihal Mendis and Tommaso Lombardi \*

**Table S1.** Literature review based summary of case reports of LEC.

| Author                         | Year | Number of Cases | Mean Age | Sex (F:M) | Location        |
|--------------------------------|------|-----------------|----------|-----------|-----------------|
| Tanaka [22]                    | 2004 | 1               | 56       | 0:1       | PT              |
| Stramandinoli-Zanicotti [24]   | 2012 | 2               | 56       | 2:0       | FM (1), LBT (1) |
| Castro [25]                    | 2015 | 1               | 21       | 1:0       | PT              |
| Sakoda [26]                    | 1983 | 1               | 19       | 1:0       | VT              |
| Khelemsky & Mandel [27]        | 2010 | 1               | 34       | 0:1       | FM              |
| Bingöl [28]                    | 2016 | 1               | 66       | 1:0       | PT              |
| Ahamed [29]                    | 2014 | 1               | 32       | 1:0       | SG              |
| Lopez-Jornet [30]              | 2007 | 1               | 27       | 1:0       | LBT             |
| Gold [31]                      | 1962 | 1               | 32       | 1:0       | FM              |
| Vickers <i>et al.</i> [32]     | 1963 | 1               | 31       | 0:1       | FM              |
| Calman [33]                    | 1963 | 1               | 40       | 0:1       | FM              |
| Young & Claman [34]            | 1967 | 1               | 42       | 0:1       | FM              |
| Merchant [35]                  | 1972 | 1               | 22       | 0:1       | FM              |
| Epivatianos <i>et al.</i> [36] | 2005 | 1               | 27       | 0:1       | FM              |
| Suzuki <i>et al.</i> [37]      | 2000 | 1               | 30       | 0:1       | LLF             |
| Iwase <i>et al.</i> [38]       | 1985 | 1               | 34       | 0:1       | FM              |
| Choi [39]                      | 2010 | 1               | 30       | 1:0       | PT              |
| Yamamoto <i>et al.</i> [40]    | 1987 | 1               | 43       | 1:0       | VT              |
| Ahn <i>et al.</i> [41]         | 1996 | 1               | 56       | 1:0       | FM              |
| Flaitz [42]                    | 2000 | 1               | 4        | 0:1       | FM              |
| Kumara <i>et al.</i> [43]      | 1995 | 1               | 29       | 0:1       | FM              |
| Chaves <i>et al.</i> [44]      | 2013 | 2               | 42       | 2:0       | VT (2)          |
| Doyle [45]                     | 1970 | 2               | 33       | 1:1       | FM (1), LBT (1) |
| Flaitz et Davis [46]           | 2004 | 1               | 72       | 0:1       | LBT             |
| Pereira <i>et al.</i> [47]     | 2009 | 1               | 46       | 1:0       | LBT             |
| Costa <i>et al.</i> [48]       | 2011 | 1               | 71       | 0:1       | VT              |
| Silva <i>et al.</i> [49]       | 2012 | 2               | 61       | 1:0       | LBT             |
| De Sousa <i>et al.</i> [50]    | 2015 | 1               | 53       | 1:0       | VT              |
| Vieira <i>et al.</i> [51]      | 2012 | 1               | 16       | 0:1       | PT              |
| Silva et al. [52]              | 2013 | 2               | 61       | 2:0       | LBT (2)         |

FM = floor of the mouth, VT = ventral tongue, BT = base of the tongue, LBT = lateral border of the tongue, HP= hard palate, SP = soft palate, BM = buccal mucosa, PT= palatine tonsil, RT = retro molar trigone, PS= palatoglossal sulcus. PG = parotid gland, SG = submandibular gland, PA = palatoglossal arch, T= tongue, OP = oropharynx, U = unknown, LLF= lateral border of the lingual frenulum, LL = lower lip, TT = tip of the tongue, DT = dorsum of the tongue.
